# Supplementary material for: ‘Chiron’ approach to the total synthesis of macrolide (+)-Aspicilin
Source: Royal Society of Chemistry journal article supplement (doi:10.1039/c3ra45530k), 2013-11-01
Supplement: c3ra45530k.pdf [file c3ra45530k.pdf]

## Supplementary Data

### **‘Chiron’ approach to the total synthesis of macrolide (+)-Aspicilin’**

Puli Saidhareddy, Sama Ajay and Arun K. Shaw\*

*Division of Medicinal and Process Chemistry, CSIR-Central Drug Research Institute, Lucknow 226 031, India.*

#### **Contents:**

|                                                                 |              |
|-----------------------------------------------------------------|--------------|
| 1. $^1\text{H}$ and $^{13}\text{C}$ data of Compound <b>13</b>  | Page No – 2  |
| 2. $^1\text{H}$ and $^{13}\text{C}$ data of Compound <b>14</b>  | Page No – 3  |
| 3. $^1\text{H}$ and $^{13}\text{C}$ data of Compound <b>9</b>   | Page No – 4  |
| 4. $^1\text{H}$ and $^{13}\text{C}$ data of Compound <b>15</b>  | Page No – 5  |
| 5. $^1\text{H}$ and $^{13}\text{C}$ data of Compound <b>10</b>  | Page No – 6  |
| 6. $^1\text{H}$ and $^{13}\text{C}$ data of Compound <b>6</b>   | Page No – 7  |
| 7. $^1\text{H}$ and $^{13}\text{C}$ data of Compound <b>8</b>   | Page No – 8  |
| 8. $^1\text{H}$ and $^{13}\text{C}$ data of Compound <b>16</b>  | Page No – 9  |
| 9. $^1\text{H}$ and $^{13}\text{C}$ data of Compound <b>17</b>  | Page No – 10 |
| 10. $^1\text{H}$ and $^{13}\text{C}$ data of Compound <b>5</b>  | Page No – 11 |
| 11. $^1\text{H}$ and $^{13}\text{C}$ data of Compound <b>4</b>  | Page No – 12 |
| 12. $^1\text{H}$ and $^{13}\text{C}$ data of Compound <b>18</b> | Page No – 13 |
| 13. $^1\text{H}$ and $^{13}\text{C}$ data of Aspicilin <b>1</b> | Page No – 14 |
| 14. NOESY spectra of Aspicilin <b>1</b> and its expansion       | page No – 15 |
| 15. HSQC spectra of Aspicilin <b>1</b>                          | page No – 16 |

---

\*Corresponding author. Tel.: +919415403775; fax: +91(522)2623405; e-mail: [akshaw55@yahoo.com](mailto:akshaw55@yahoo.com)

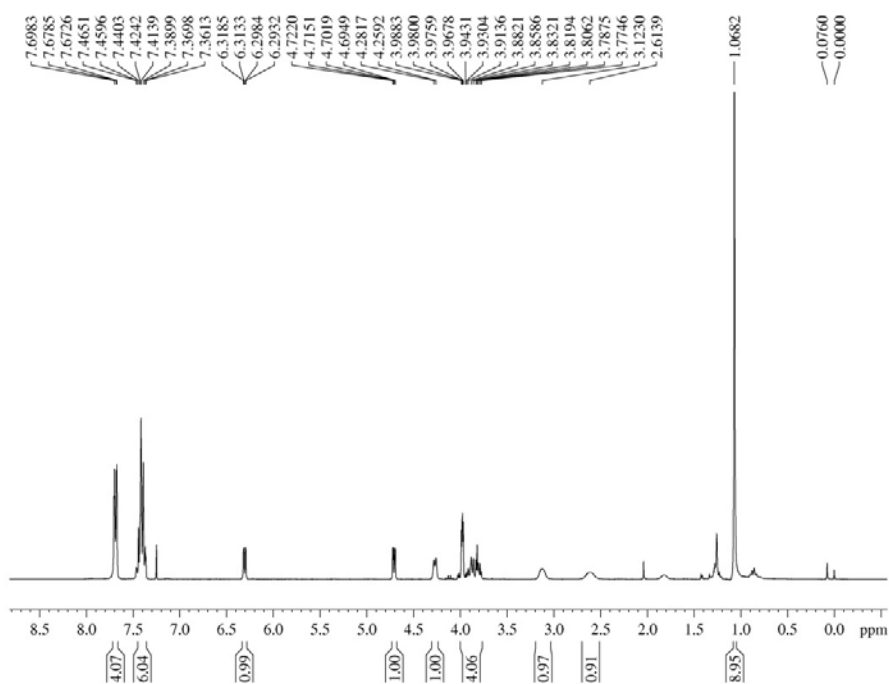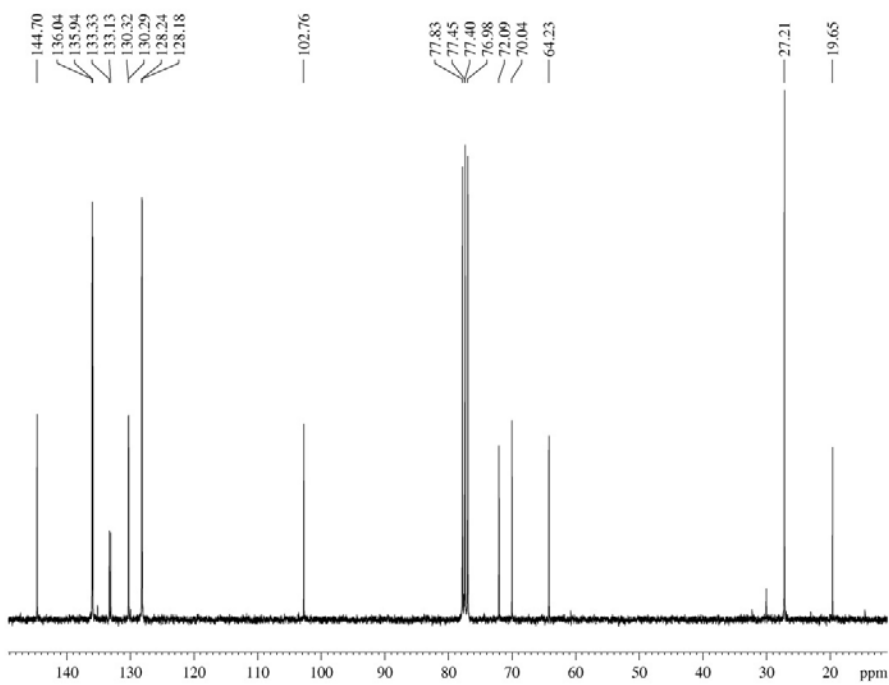

**<sup>1</sup>H and <sup>13</sup>C spectra of compound 13**

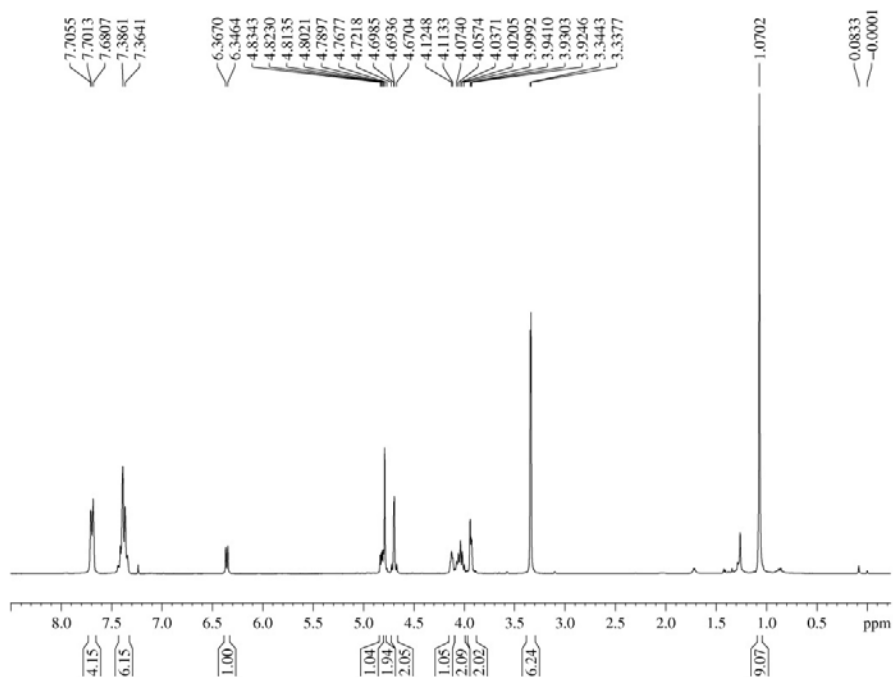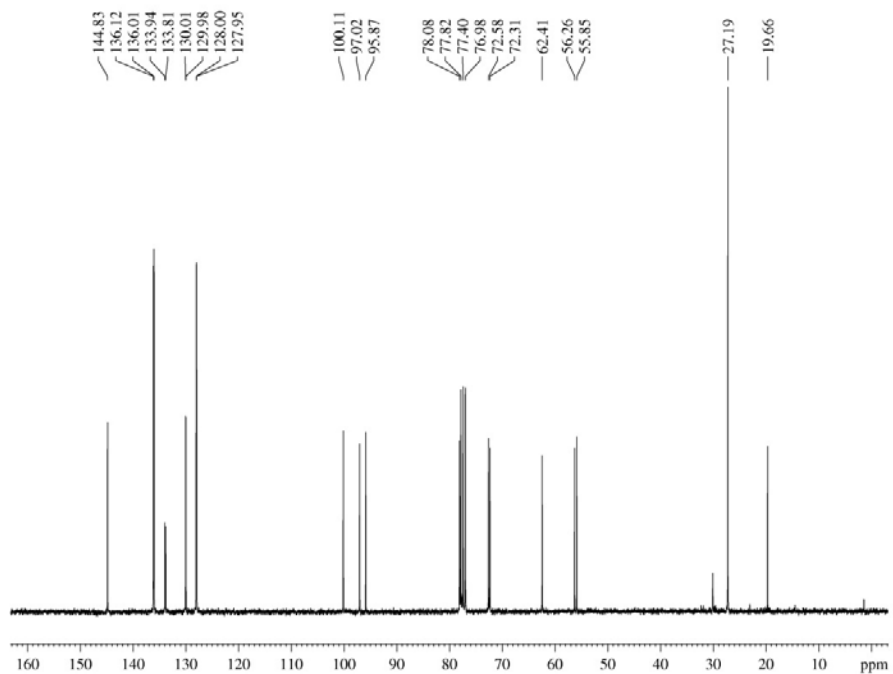

**<sup>1</sup>H and <sup>13</sup>C spectra of compound 14**

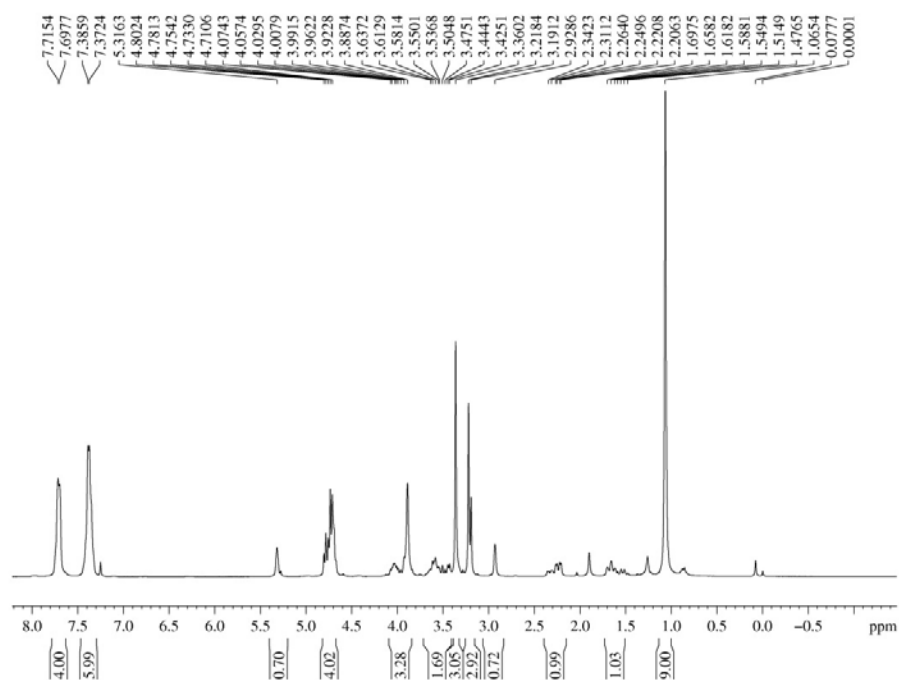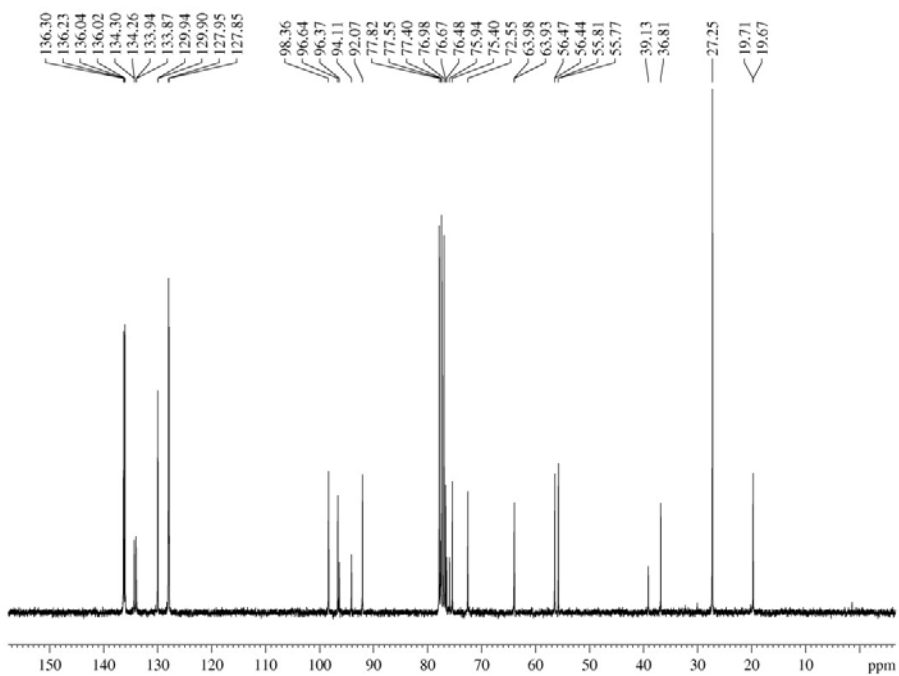

**<sup>1</sup>H and <sup>13</sup>C spectra of compound 9**

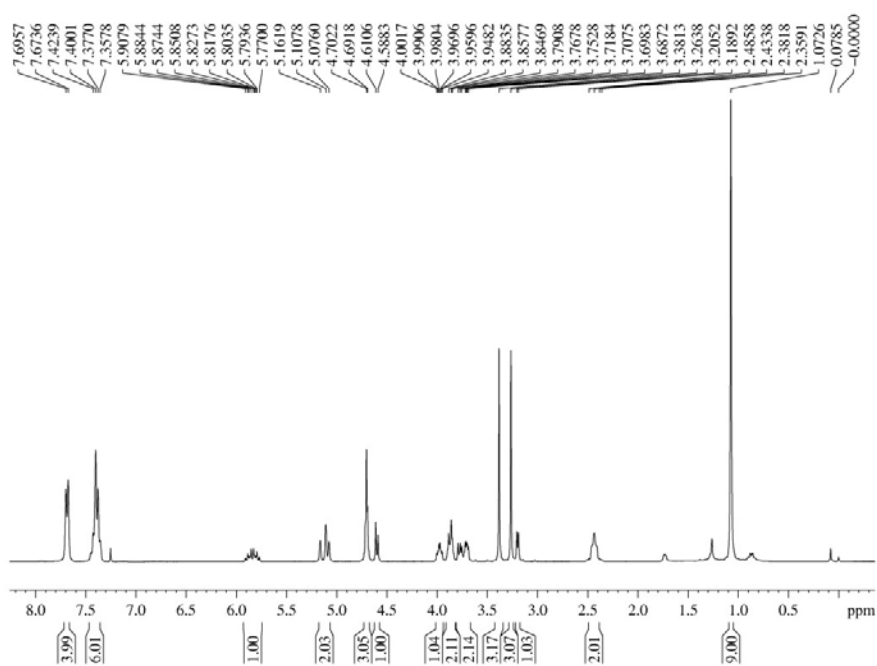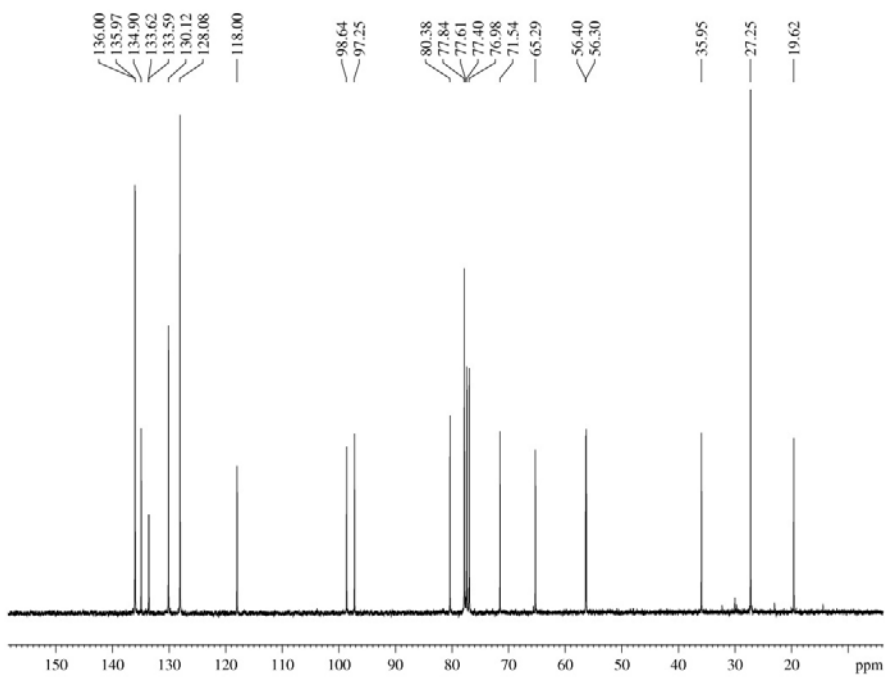

**<sup>1</sup>H and <sup>13</sup>C spectra of compound 15**

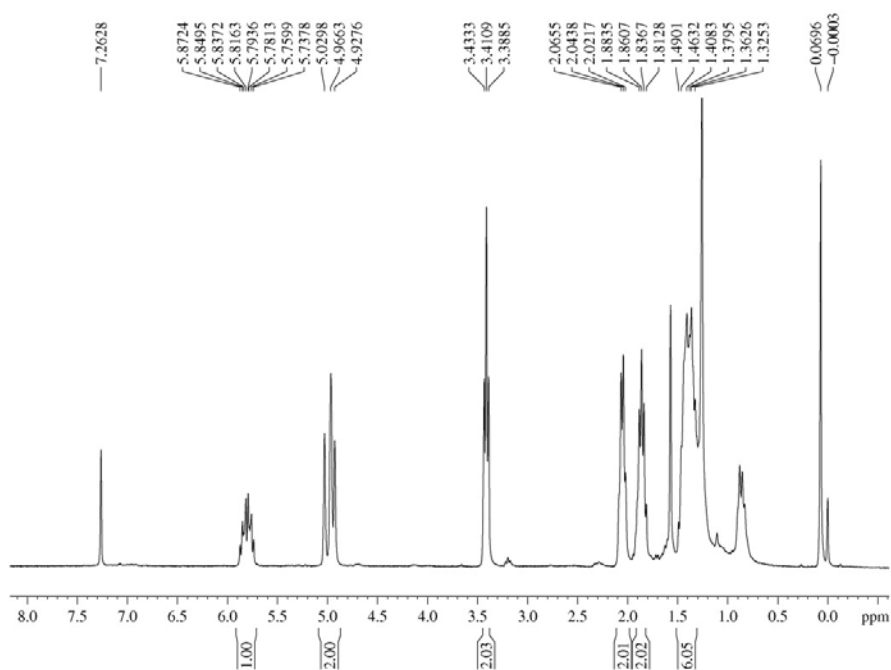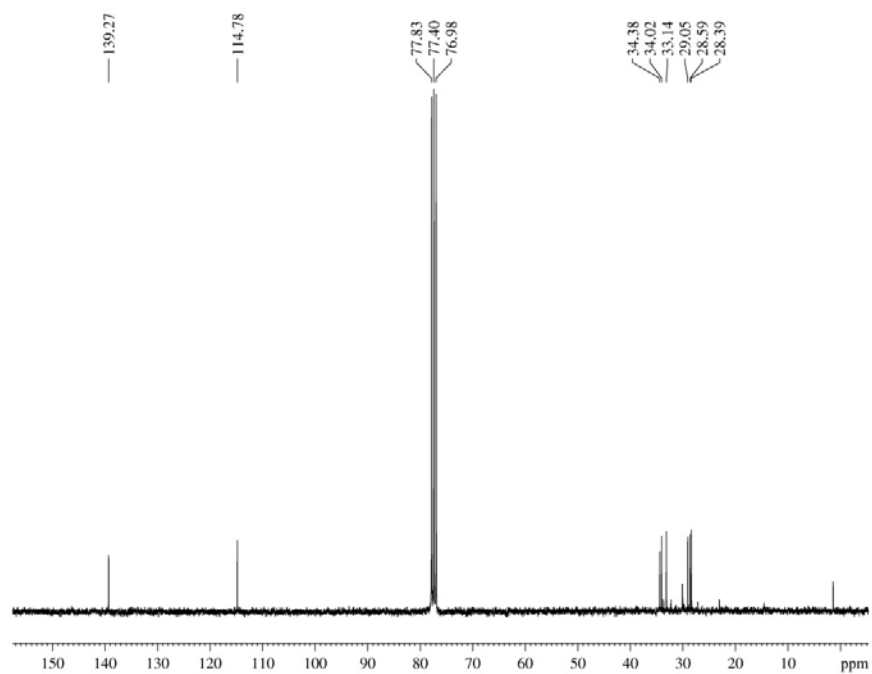

**<sup>1</sup>H and <sup>13</sup>C spectra of compound 10**

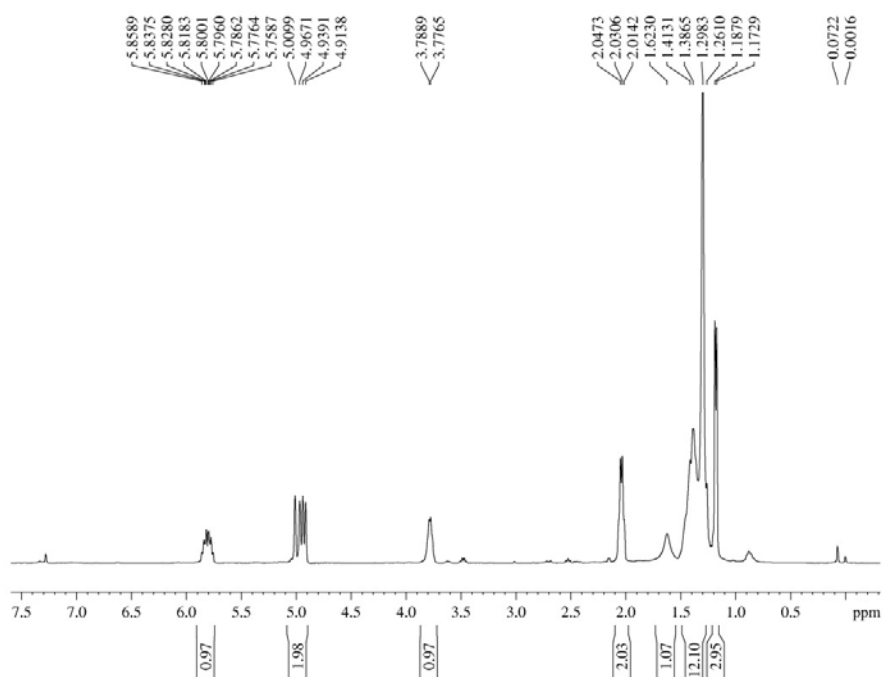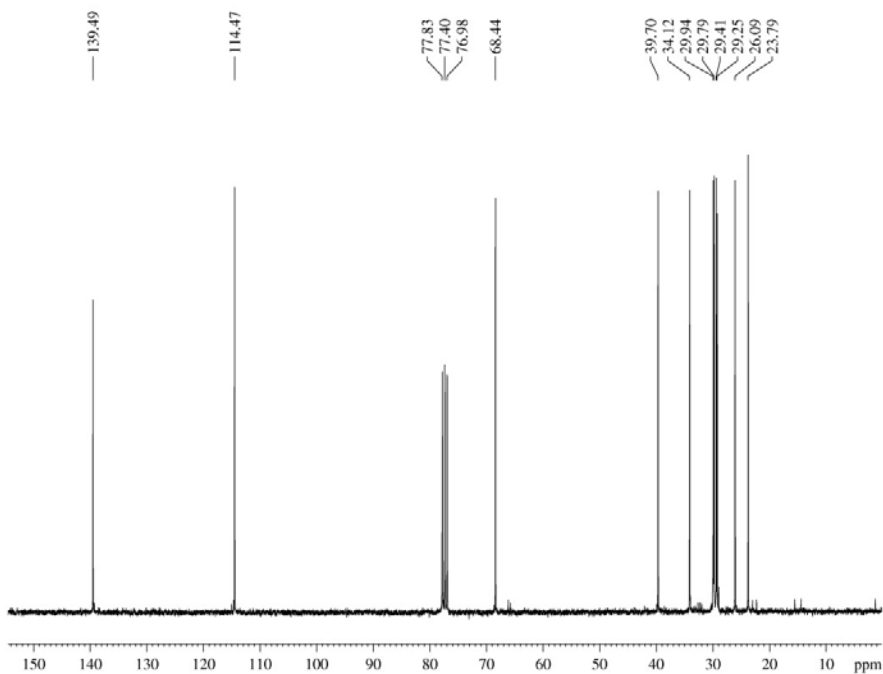

$^1\text{H}$  and  $^{13}\text{C}$  spectra of compound 6

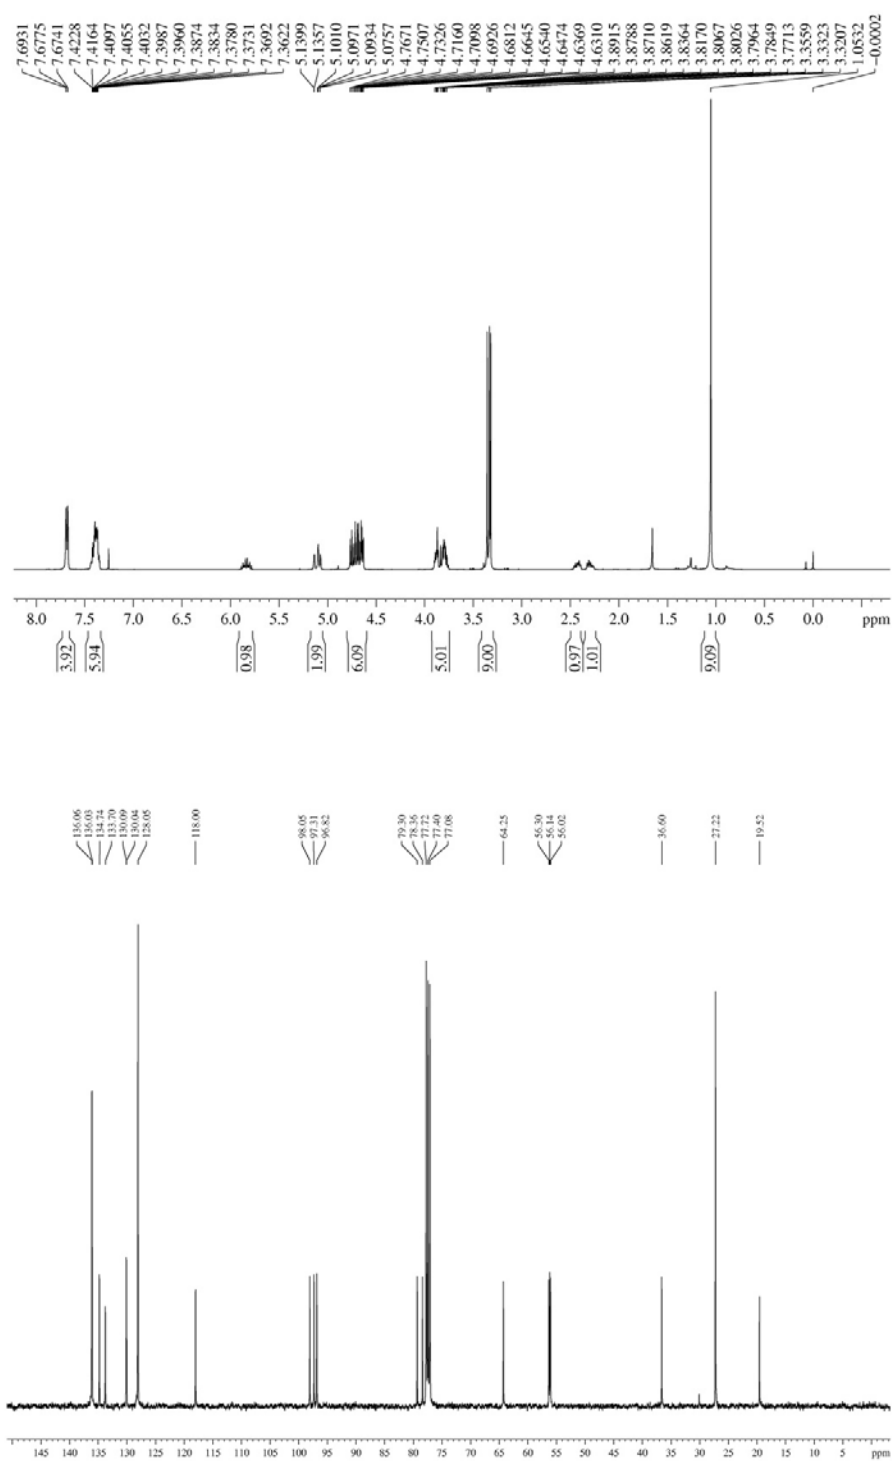

**$^1\text{H}$  and  $^{13}\text{C}$  spectra of compound 8**



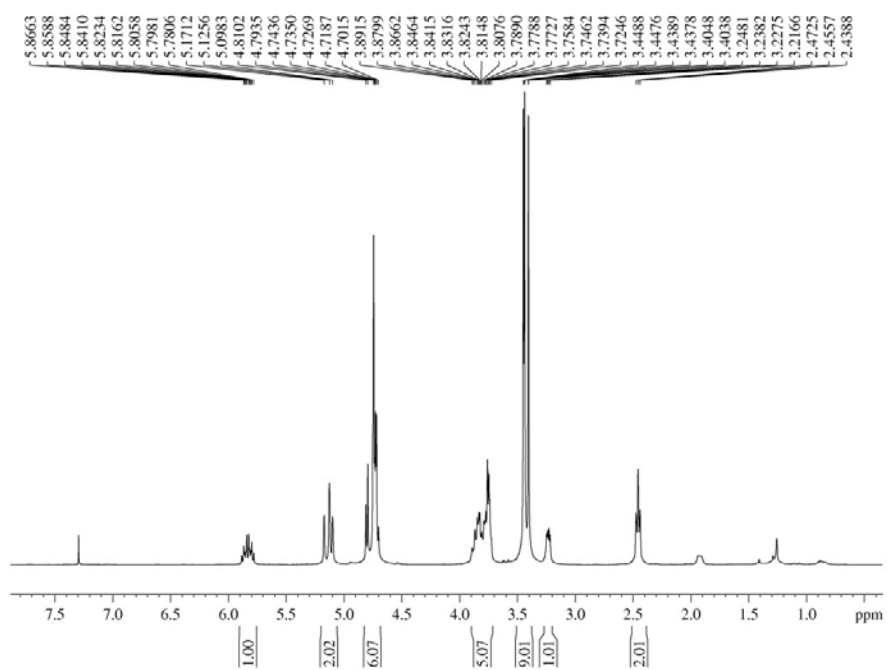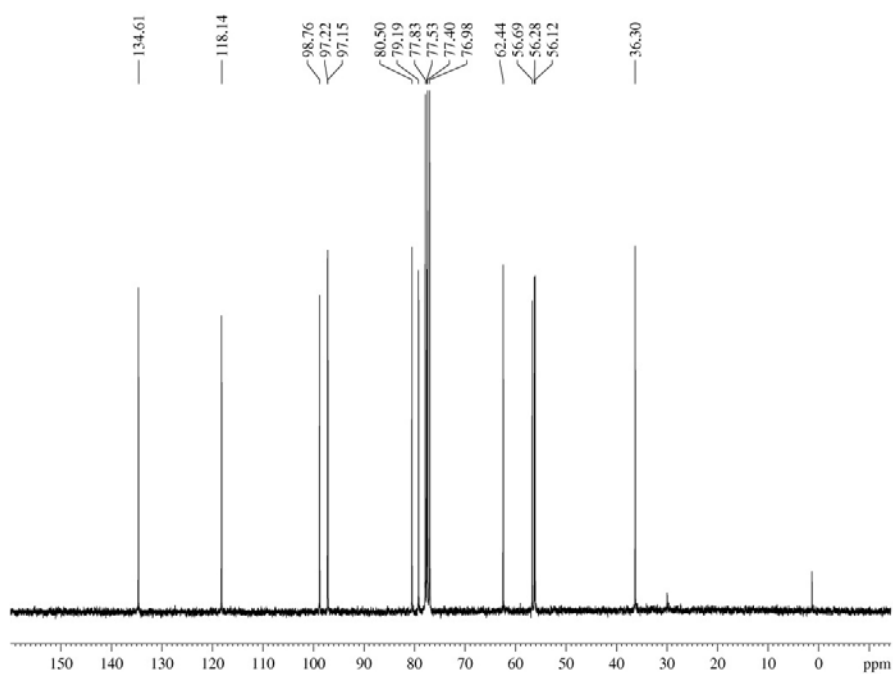

**<sup>1</sup>H and <sup>13</sup>C spectra of compound 16**

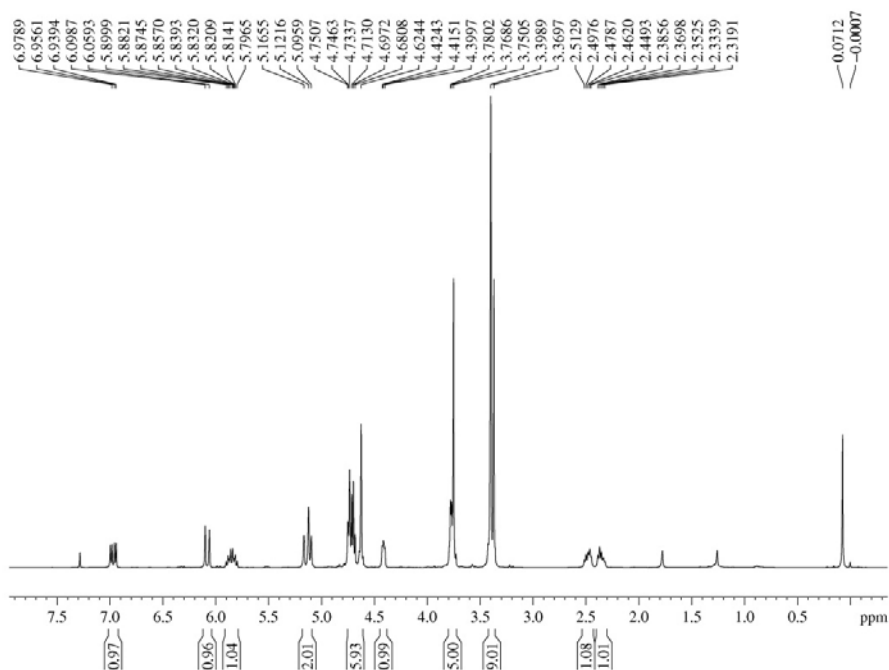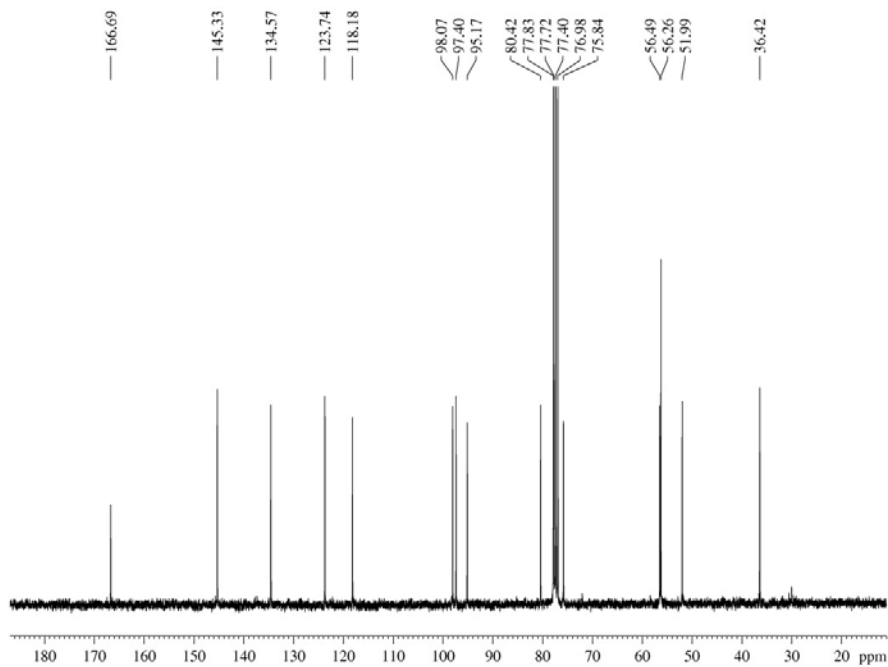

**<sup>1</sup>H and <sup>13</sup>C spectra of compound 17**

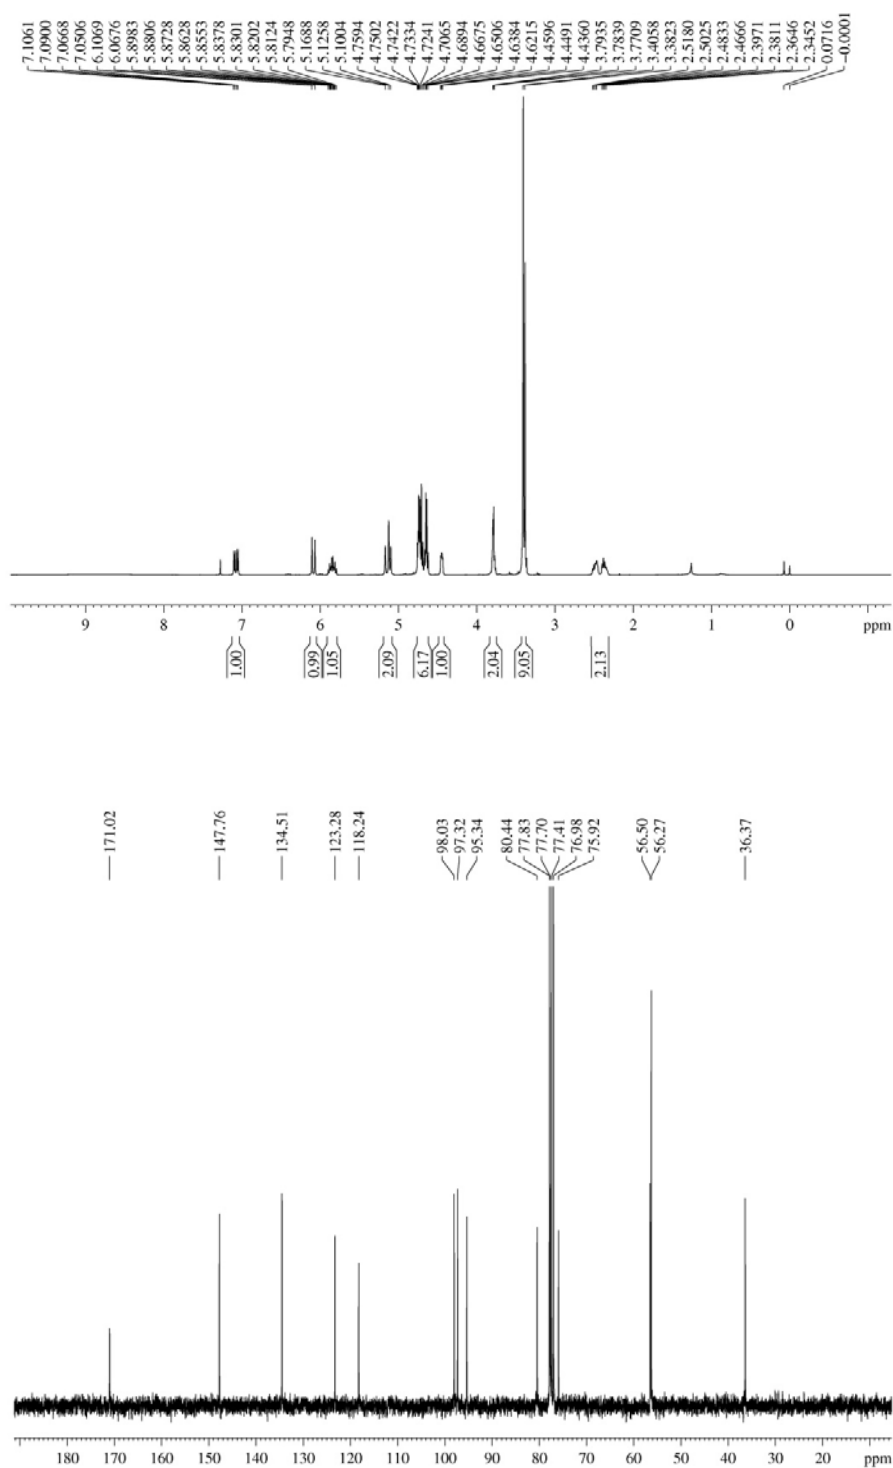

$^1\text{H}$  and  $^{13}\text{C}$  spectra of compound 5

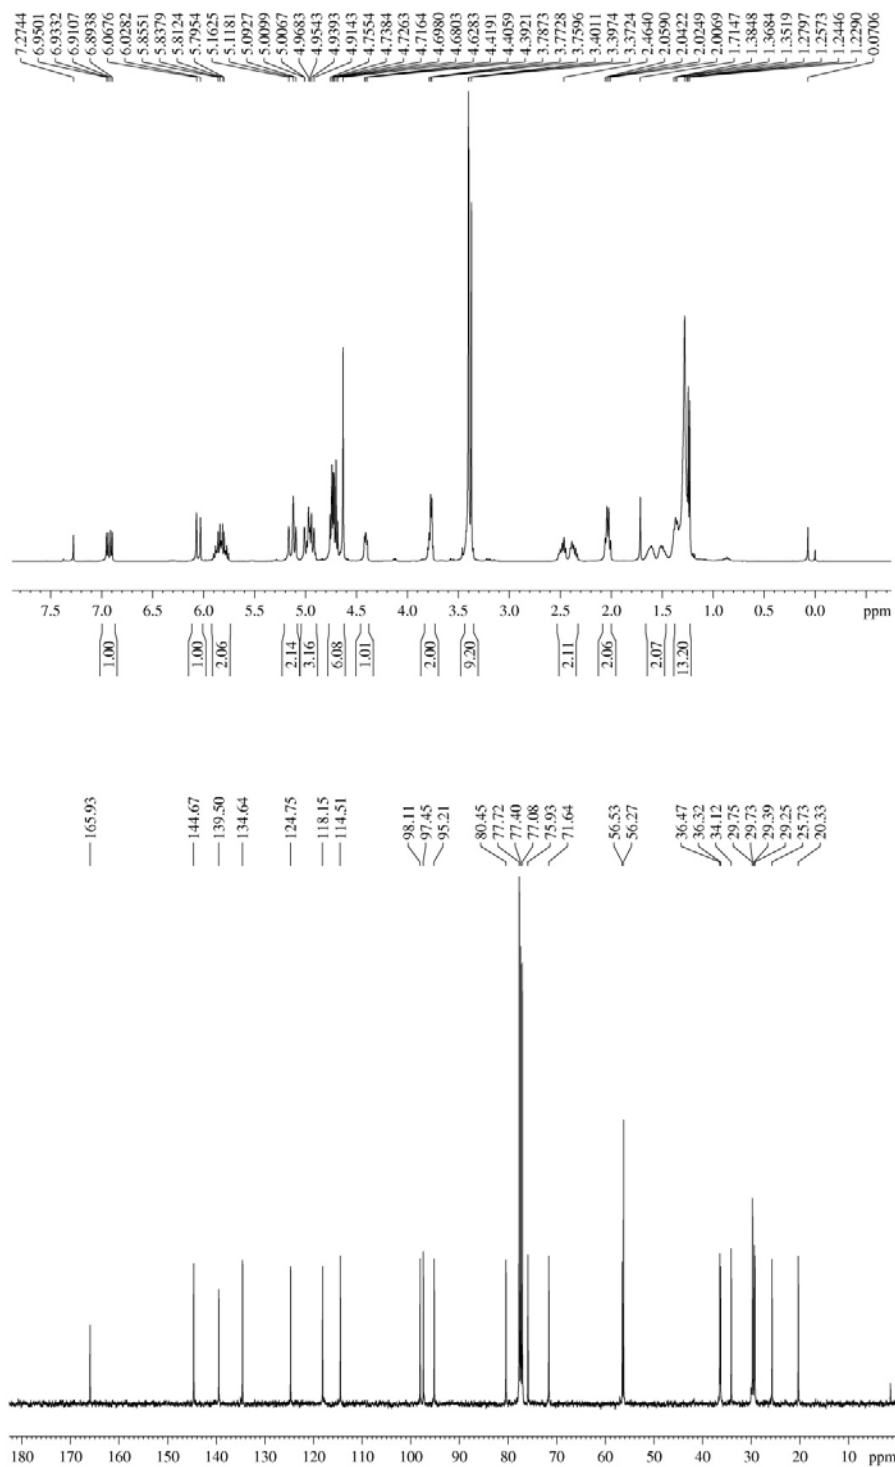

**$^1\text{H}$  and  $^{13}\text{C}$  spectra of compound 4**

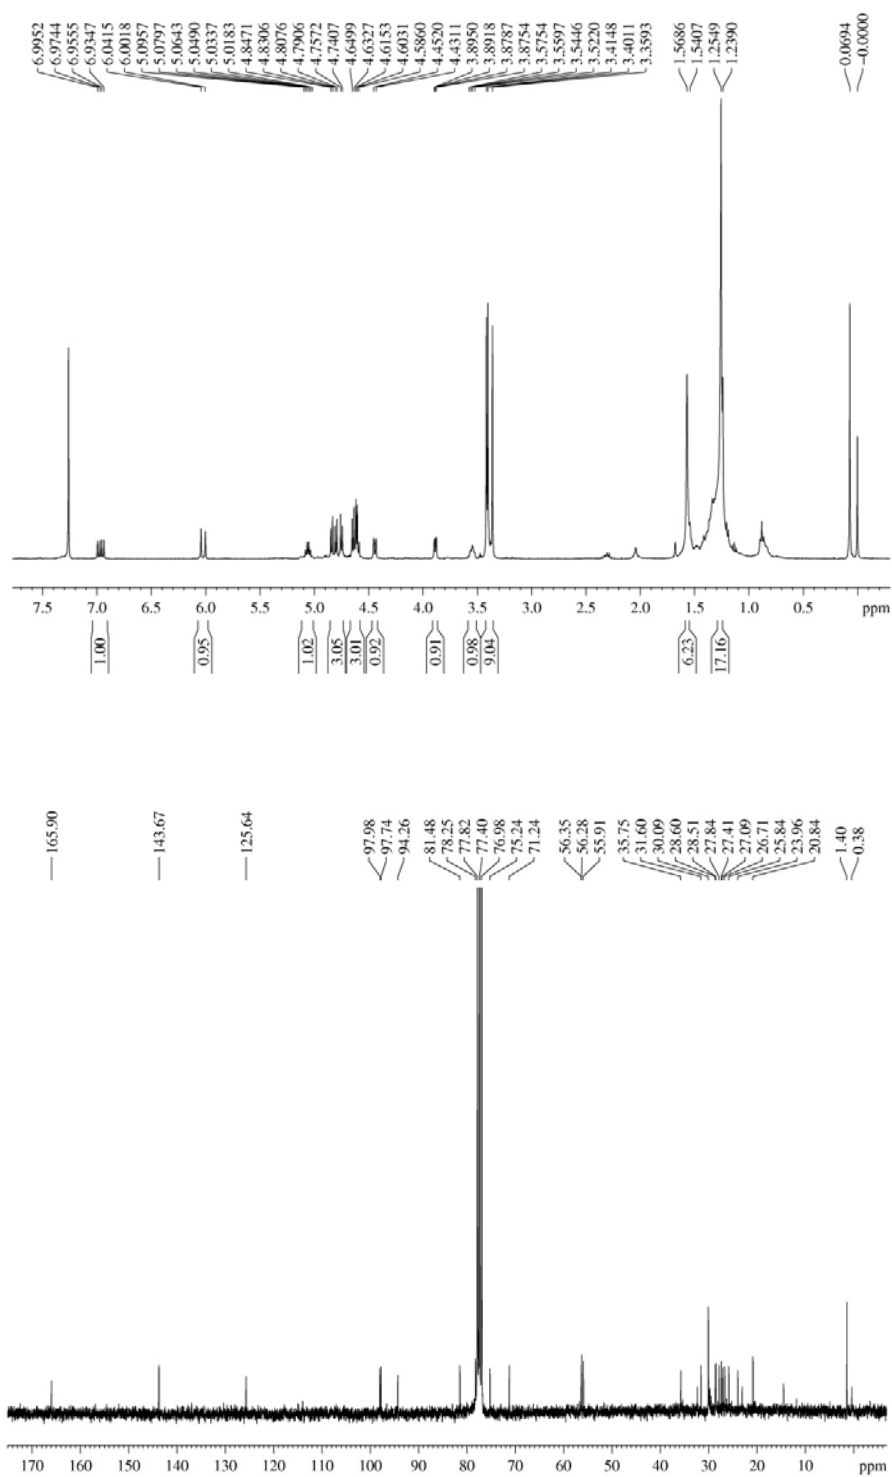

**$^1\text{H}$  and  $^{13}\text{C}$  spectra of compound 18**

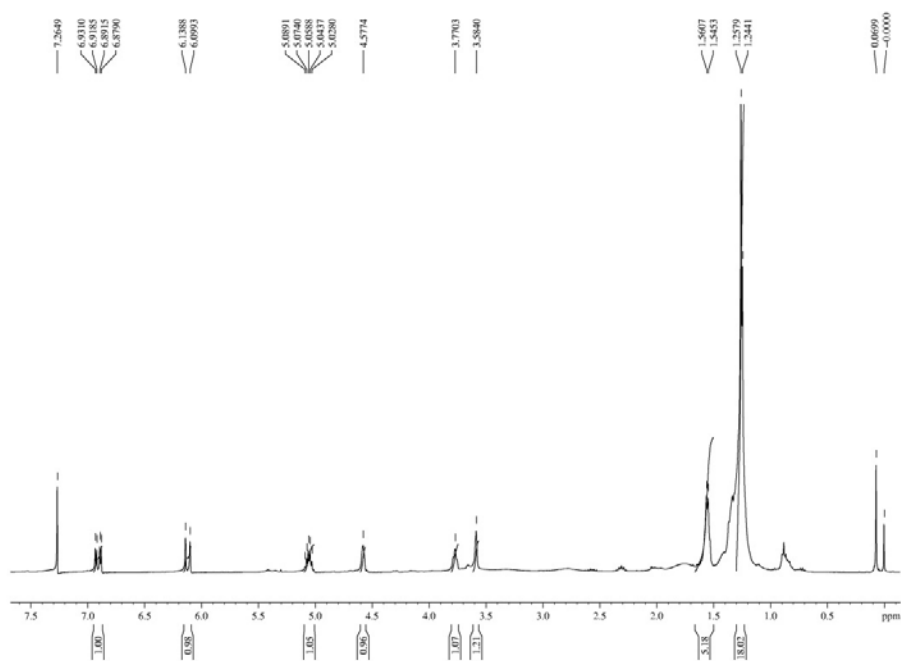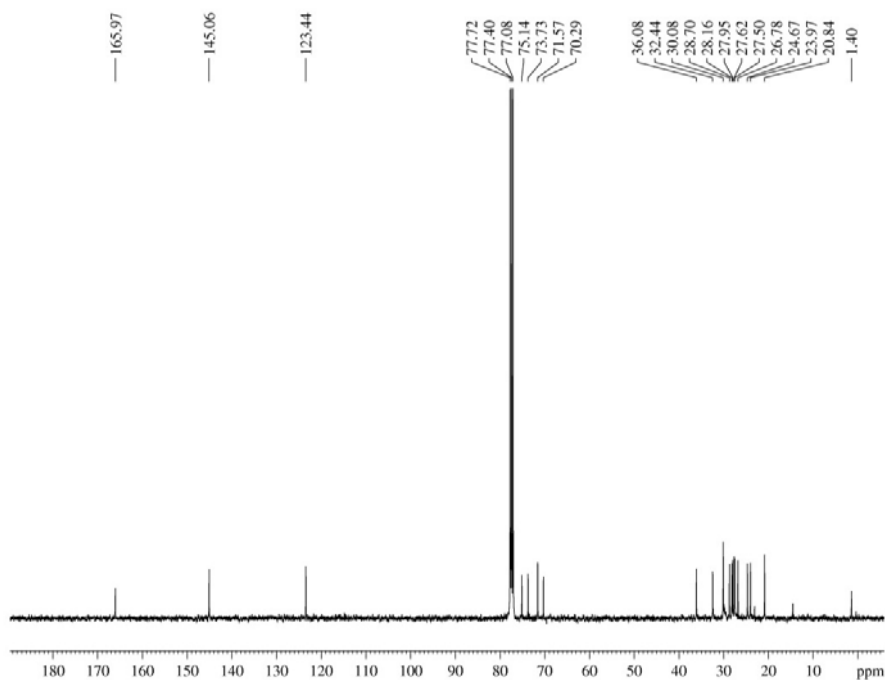

**<sup>1</sup>H and <sup>13</sup>C spectra of Aspicilin 1**

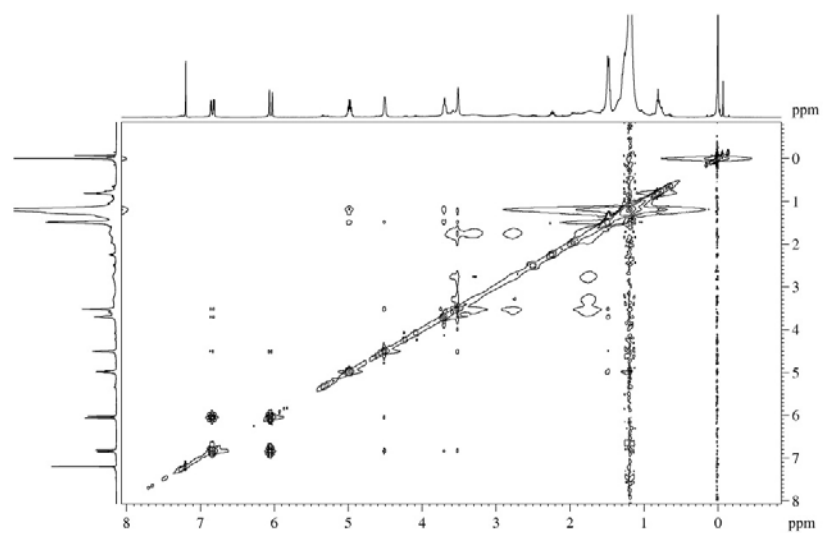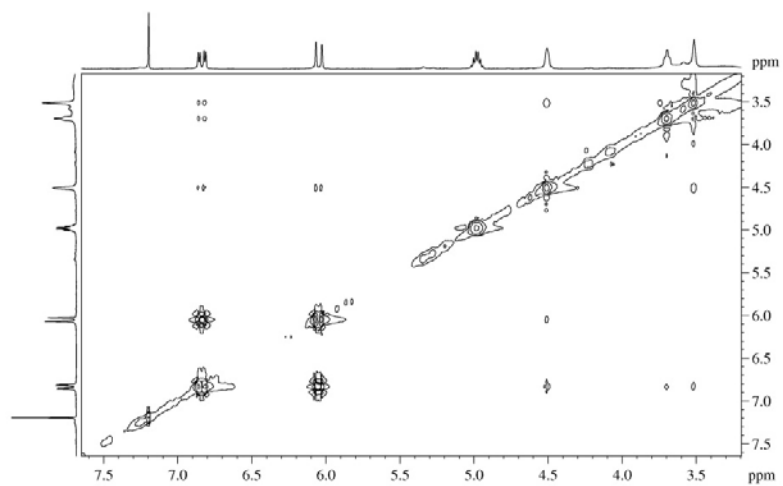

## NOESY spectra of Aspicilin 1 and its expansion

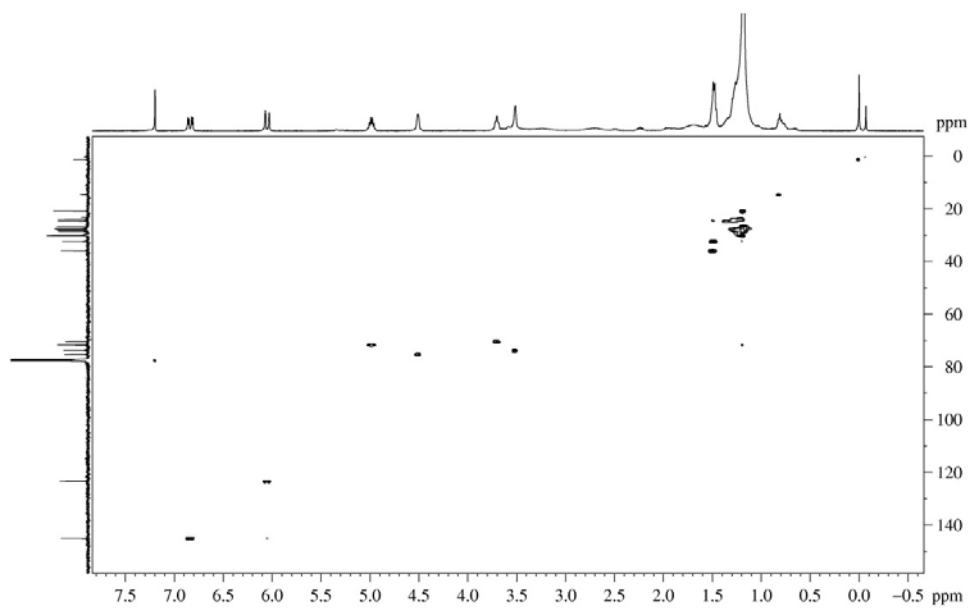

## HSQC spectra of Aspicilin 1
